# Supplementary material for: Modeling Dynamic Regulatory Processes in Stroke
Source: PLoS Comput Biol. 2012 Oct 11;8(10):e1002722. doi: 10.1371/journal.pcbi.1002722 (PMC3469412; doi:10.1371/journal.pcbi.1002722)
Supplement: Table S1 — Optimization results for model ensembles from all pretreatments (data file). (XLSX) [file pcbi.1002722.s005.xlsx]

## Sheet: LPSOpt
Ensemble results from LPS-optimized models
	Training	Evaluation
Model	LPS	CpG	Pre	Sal	Sham
1	0.710937	0.268385	-0.0723372	0.347303	-0.193663
2	0.687367	0.172686	-0.0377151	0.319319	-0.0999442
3	0.685528	-0.223974	0.104978	0.121177	-0.019499
4	0.6738	0.186712	0.00450329	0.284949	-0.179345
5	0.63591	0.226685	0.144147	0.208002	-0.00359953
6	0.626643	0.377756	-0.0138393	0.404279	-0.0257513
7	0.643507	0.413194	-0.000210842	0.277115	-0.0137619
8	0.672234	0.250219	-0.116132	0.33146	-0.117222
9	0.626645	0.377753	-0.013836	0.404278	-0.0257498
10	0.70834	0.130934	-0.0299568	0.21497	-0.148148
11	0.684194	0.280123	-0.128044	0.322452	-0.183443
12	0.649923	-0.218193	-0.38981	0.133875	-0.10298
13	0.626644	0.377757	-0.0138483	0.404279	-0.025768
14	0.697302	0.258195	0.0285263	0.277054	-0.0792281
15	0.626832	0.384574	0.00749687	0.399312	-0.0126971
16	0.714027	0.127892	-0.0554585	0.302542	-0.0946774
17	0.697103	0.319731	0.0907701	0.293537	-0.02566
18	0.678527	0.281926	-0.0701686	0.402759	-0.279094
19	0.640084	0.412615	-0.0131656	0.296392	0.0146409
20	0.648941	0.0408689	-0.112844	0.304629	-0.202757
21	0.629405	0.416621	-0.217838	0.505449	-0.24237
22	0.678375	0.377848	0.0299501	0.229603	-0.0215134
23	0.640353	0.228069	0.0209034	0.353306	-0.0252716
24	0.63918	0.421559	-0.109807	0.3833	-0.0688092
25	0.67842	0.353924	0.00231542	0.259445	-0.0645647
EnsembleMedian	0.614814	0.410083	-0.00455334	0.217216	-0.0388131
EnsembleMean	0.473769	0.41174	-0.187272	0.151233	-0.0371836
Mean	0.664009	0.249754	-0.0384568	0.311231	-0.089635
Mean-Back	0.655013	0.282214	-0.0487176	0.326077	-0.113733
p-value (scrambled lps background)	2.77124e-44	1.07237e-09	0.086089	1.57556e-15	9.48987e-05
p-value (replace-sampled lps background)	4.29556e-52	3.49417e-12	0.941888	7.29139e-16	0.000791859
p-value (replace lps background)	2.09043e-44	7.92102e-10	0.0189479	1.68569e-10	0.0959204
		+++		+++

## Sheet: CpGOpt
Ensemble results from CpG-optimized models
	Evaluation	Training	Evaluation
Model	LPS	CpG	Pre	Sal	Sham
1	0.379845	0.754156	-0.051754	0.148477	-0.179634
2	0.424446	0.702829	-0.161041	0.235826	-0.265847
3	0.368409	0.788038	-0.0818135	0.303738	-0.190442
4	0.291839	0.787454	-0.0886898	0.360585	-0.193649
5	0.424404	0.702892	-0.161033	0.235784	-0.265953
6	0.418889	0.70358	-0.158208	0.208194	-0.266087
7	0.367478	0.76872	-0.15403	0.299366	-0.164769
8	0.376224	0.778177	-0.148141	-0.123805	-0.182042
9	0.379468	0.804693	-0.101468	0.20943	-0.123777
10	0.449693	0.743113	-0.132066	0.215833	-0.166541
11	0.28914	0.780333	-0.0785494	0.263956	-0.184395
12	0.389224	0.756834	-0.131134	0.313696	-0.195353
13	0.407513	0.801575	-0.119323	0.278422	-0.115909
14	0.424446	0.702841	-0.161041	0.235835	-0.265847
15	0.371567	0.766128	-0.0860225	0.33619	-0.131519
16	0.424446	0.702832	-0.161047	0.23591	-0.265837
17	0.368893	0.755224	-0.15162	0.244246	-0.205585
18	0.377109	0.762149	-0.101729	0.020493	-0.254988
19	0.424283	0.73741	-0.156267	0.240751	-0.241254
20	0.424464	0.702859	-0.161023	0.235842	-0.265849
21	0.374798	0.756099	-0.154639	0.248709	-0.203358
22	0.427761	0.773346	-0.11635	0.169911	-0.217796
23	0.478682	0.790435	-0.0867041	0.242562	-0.182333
24	0.416759	0.784136	-0.141318	0.217349	-0.226165
25	0.363702	0.776866	-0.13541	0.319728	-0.202435
EnsembleMedian	0.365049	0.678428	-0.183041	0.243687	-0.205664
EnsembleMean	0.396568	0.601838	-0.1763	0.217332	-0.262715
Mean	0.393739	0.755309	-0.127217	0.227881	-0.206294
Mean-Back	0.384743	0.787768	-0.137478	0.242727	-0.230393
p-value (scrambled lps background)	1.96887e-24	5.3043e-41	2.30874e-06	1.04461e-09	1.35168e-13
p-value (replace-sampled lps background)	4.53534e-30	1.84959e-47	0.00133449	5.93307e-10	4.46521e-11
p-value (replace lps background)	7.4728e-25	9.44616e-42	0.381934	2.47993e-06	1.34142e-07
	+++			+++

## Sheet: PreOpt
Ensemble results from ischemia-optimized models
	Evaluation		Training	Evaluation
Model	LPS	CpG	Pre	Sal	Sham
1	-0.0888878	0.0148611	0.660039	-0.29889	0.0607281
2	-0.0241211	-0.09702	0.638453	-0.295821	0.0356371
3	-0.0548337	-0.0357089	0.649764	-0.262349	0.00710207
4	-0.208057	-0.1183	0.653261	-0.272216	0.0114941
5	-0.091726	0.027442	0.653796	-0.261799	-0.00825626
6	-0.0619023	0.0421465	0.627471	-0.180257	-0.00283694
7	-0.067847	-0.00930381	0.644331	-0.274203	0.0105567
8	0.0564535	-0.0273472	0.660262	-0.340577	0.0460235
9	-0.00809359	0.0768122	0.664205	-0.295223	0.074781
10	-0.0263119	-0.102363	0.651958	-0.239109	0.0299548
11	-0.0546956	0.0328389	0.627972	-0.254156	0.000623863
12	-0.118365	-0.103011	0.637773	-0.341564	0.0603032
13	-0.0999251	0.0136441	0.663677	-0.323653	0.0662057
14	-0.138717	0.0447049	0.66519	-0.272162	0.02701
15	-0.188135	0.000156146	0.663448	-0.269713	0.0105012
16	0.0453713	0.0276971	0.656438	-0.298306	0.00283436
17	-0.00411906	0.136123	0.635582	-0.226209	0.104224
18	-0.102976	0.0451713	0.655168	-0.276999	0.0445987
19	-0.0474722	0.0861519	0.633245	-0.288869	0.0935405
20	0.0035765	0.0815617	0.653755	-0.286062	0.0430033
21	-0.0086576	0.100868	0.661683	-0.267096	0.0472259
22	-0.194471	-0.047492	0.651434	-0.282533	0.0451394
23	-0.151724	0.00709203	0.659148	-0.262879	-0.0115914
24	-0.0621886	0.0423253	0.62747	-0.180298	-0.00193838
25	-0.0545244	0.00542507	0.634904	-0.305747	0.0115036
EnsembleMedian	-0.0974821	0.011538	0.636593	-0.247054	-0.0213937
EnsembleMean	-0.0753937	0.0637767	0.431348	-0.196153	-0.00544822
Mean	-0.070094	0.00977903	0.649217	-0.274268	0.0323347
Mean-Back	-0.0790899	0.0422387	0.638956	-0.259422	0.00823655
p-value (scrambled lps background)	0.0108358	0.288707	3.48195e-46	1.80473e-11	0.754797
p-value (replace-sampled lps background)	0.00210964	0.129855	6.84465e-50	4.95492e-14	0.718575
p-value (replace lps background)	0.0323388	0.334711	2.40858e-57	4.6429e-11	0.0203993

## Sheet: SalOpt
Ensemble results from ischemia-optimized models
	Evaluation			Training	Evaluation
Model	LPS	CpG	Pre	Sal	Sham
1	0.187476	0.394976	-0.229458	0.759832	-0.265094
2	0.187478	0.394975	-0.229458	0.759832	-0.265094
3	0.18749	0.394973	-0.229771	0.759887	-0.265014
4	0.218576	0.387399	-0.216527	0.760004	-0.252288
5	0.193414	0.395762	-0.228852	0.759873	-0.265292
6	0.187473	0.394973	-0.229459	0.759832	-0.265094
7	0.186491	0.394429	-0.23031	0.75992	-0.266112
8	0.184774	0.39384	-0.264057	0.766231	-0.28909
9	0.382236	0.315395	-0.23557	0.783998	-0.257055
10	0.331969	0.386351	-0.214744	0.777034	-0.28826
11	0.186718	0.394568	-0.229837	0.759854	-0.265942
12	0.432531	0.534939	-0.227641	0.786158	-0.257903
13	0.187478	0.394975	-0.229458	0.759832	-0.265095
14	0.187478	0.394975	-0.229458	0.759832	-0.265094
15	0.190904	0.393847	-0.230576	0.760008	-0.263874
16	0.187459	0.394794	-0.230439	0.759863	-0.265757
17	0.193488	0.395646	-0.229362	0.759885	-0.265768
18	0.191187	0.34867	-0.266494	0.764457	-0.259009
19	0.190059	0.395055	-0.229701	0.75993	-0.266022
20	0.193633	0.395923	-0.228741	0.759873	-0.264957
21	0.335457	0.407814	-0.263732	0.761866	-0.295435
22	0.187478	0.394975	-0.229458	0.759832	-0.265094
23	0.228168	0.328444	-0.244079	0.763771	-0.280017
24	0.186529	0.394464	-0.229927	0.759859	-0.266153
25	0.180366	0.557611	-0.131249	0.767267	-0.234735
EnsembleMedian	0.187059	0.394753	-0.229668	0.759844	-0.265558
EnsembleMean	0.234511	0.433849	-0.17256	0.619535	-0.19466
Mean	0.220252	0.399191	-0.229534	0.763549	-0.26637
Mean-Back	0.211256	0.43165	-0.239795	0.778395	-0.290468
p-value (scrambled lps background)	1.56447e-10	5.97631e-20	8.5445e-15	5.75447e-45	3.20168e-19
p-value (replace-sampled lps background)	3.68399e-13	8.29275e-25	1.43855e-10	1.25364e-47	9.49619e-16
p-value (replace lps background)	5.11835e-11	1.7265e-20	3.67527e-06	8.60515e-37	4.28191e-12
	+++	+++

## Sheet: ShamOpt
Ensemble results from ischemia-optimized models
	Evaluation				Training
Model	LPS	CpG	Pre	Sal	Sham
1	0.123159	-0.01037	0.236807	-0.100335	0.654868
2	0.087822	-0.130017	0.10142	-0.188243	0.645942
3	0.05304	-0.0616965	0.131312	-0.175866	0.652694
4	0.127742	-0.15822	0.0683172	-0.195879	0.647662
5	0.087822	-0.130017	0.10142	-0.188243	0.645942
6	0.0773607	-0.0876355	0.17222	-0.085178	0.676562
7	-0.0959765	-0.127932	0.138246	-0.0927807	0.664731
8	0.00443034	-0.273726	0.167918	-0.232969	0.665258
9	0.093798	-0.162938	0.103178	-0.197905	0.646624
10	0.0607152	-0.0401776	0.178939	-0.126278	0.675318
11	0.115208	0.02229	0.145579	-0.215805	0.660039
12	0.087822	-0.130017	0.10142	-0.188243	0.645942
13	0.087822	-0.130017	0.10142	-0.188243	0.645942
14	0.12217	-0.172928	0.155119	-0.138186	0.708156
15	0.0532391	-0.285973	0.118406	-0.1993	0.661195
16	0.102754	-0.137075	0.119083	-0.222415	0.669087
17	0.087822	-0.130017	0.10142	-0.188243	0.645942
18	0.0400086	-0.13616	0.115403	-0.229636	0.660103
19	-0.00450051	-0.272896	0.163219	-0.21811	0.664916
20	-0.00557276	-0.104432	0.0745453	-0.17948	0.676339
21	0.111153	0.00302094	0.159485	-0.0466565	0.697815
22	0.195236	0.0383834	0.17864	-0.185368	0.646495
23	0.114529	-0.307984	0.0716002	-0.214651	0.656456
24	0.0748717	-0.0826549	0.155987	-0.093946	0.671327
25	0.087822	-0.130017	0.10142	-0.188243	0.645942
EnsembleMedian	0.0697951	-0.231054	0.121457	-0.217423	0.643209
EnsembleMean	0.151775	0.0324422	0.122991	-0.0587534	0.392584
Mean	0.0756119	-0.125568	0.130501	-0.171208	0.661252
Mean-Back	0.0666159	-0.0931086	0.12024	-0.156363	0.637154
p-value (scrambled lps background)	0.029183	0.0189384	3.23807e-05	1.86788e-05	1.40914e-46
p-value (replace-sampled lps background)	0.0119653	0.0187455	1.99766e-08	5.03915e-07	1.32742e-41
p-value (replace lps background)	0.011738	0.0127617	2.72313e-15	7.22383e-06	2.78932e-47
	+++		+++

## Sheet: ScrambleBackground
Performance results from sets of models randomized from the best LPS-optimized model as indicated
Scrambled background based on best							Replace-sampled background based on best							Replace background based on best
Model	LPS	CpG	Pre	Sal	Sham		Model	LPS	CpG	Pre	Sal	Sham		Model	LPS	CpG	Pre	Sal	Sham
1	0.00748745	-0.0682406	0.105016	-0.035791	0.081855		1	-0.232412	-0.107526	-0.13309	0.0770947	0.143649		1	-0.0361706	0.0723715	-0.269831	0.336898	-0.21031
2	0.178071	0.0595238	0.0884689	0.181787	-0.0808628		2	-0.0355438	-0.0140497	-0.0424151	-0.0377429	0.0382814		2	0.175622	0.0641425	-0.248186	0.219077	-0.211763
3	0.102947	0.278126	0.000146183	0.293344	-0.179335		3	-0.0562247	-0.275603	-0.256347	-0.151411	0.185996		3	-0.147392	-0.12051	-0.119263	-0.129532	0.0799823
4	-0.175627	-0.245671	0.101184	-0.284619	0.32543		4	-0.0436017	-0.0550725	0.256517	-0.152847	0.256823		4	-0.217039	-0.332856	-0.0972203	-0.166056	0.117365
5	0.228994	-0.00492236	-0.0542591	0.0546645	0.0641175		5	0.113557	0.0438391	-0.234686	0.240401	-0.109613		5	0.0869899	-0.0292875	-0.102576	0.177671	-0.0843205
6	0.211424	0.175638	-0.0340095	-0.236331	0.0592601		6	0.0829032	-0.091191	0.00983262	0.00950489	-0.0418041		6	0.113954	0.151542	-0.102662	0.228789	-0.270007
7	0.0724545	0.0414603	-0.0348602	0.203936	-0.0489816		7	0.0618643	0.0629882	-0.0755551	-0.0939257	0.0185737		7	0.00514333	-0.134986	-0.309247	0.0334403	-0.098316
8	0.131771	0.0967346	-0.117874	-0.163616	-0.189611		8	-0.0118541	0.111088	0.01345	-0.021837	0.127703		8	0.269311	0.260679	-0.258274	0.446552	-0.198208
9	-0.105841	-0.0912069	0.0643068	0.111834	-0.108246		9	0.0667504	-0.275791	-0.125559	-0.309109	0.108897		9	-0.197557	-0.384824	-0.185461	-0.155503	0.118477
10	-0.119522	-0.338305	0.0424057	0.260386	0.283769		10	0.248061	0.153361	0.107762	0.0463161	0.0641357		10	-0.106259	-0.0688854	-0.160867	0.0331205	-0.186833
11	-0.086993	-0.0147681	0.141525	-0.0629889	0.042372		11	0.0479509	-0.105037	-0.0714178	-0.0921678	0.283329		11	-0.00831952	0.0809945	-0.255357	0.222507	-0.139264
12	0.12163	0.174283	-0.157623	0.0752714	-0.100704		12	0.284459	-0.160969	-0.0246356	0.166491	-0.169641		12	0.149656	0.146857	0.178352	0.0468871	-0.0770572
13	-0.0961063	-0.0998108	-0.0313505	0.0422623	-0.0186728		13	-0.0581118	-0.178277	-0.0742322	-0.157641	0.123621		13	0.0396863	0.0331811	-0.214599	0.0996567	-0.125931
14	0.0833497	0.219331	0.0453707	-0.0137584	0.0573805		14	-0.128995	-0.207985	-0.136704	-0.0580701	0.0524418		14	0.252672	0.0736436	-0.247805	0.283445	-0.0687341
15	0.196507	0.10111	-0.168144	-0.151088	0.153818		15	-0.120706	-0.207287	0.0407166	-0.234385	0.145753		15	-0.0176924	-0.0437246	-0.213479	-0.0426351	-0.177921
16	-0.271576	-0.402375	0.301954	-0.133052	0.0809131		16	-0.0314872	-0.153538	0.0493504	0.0655996	0.0423448		16	0.261213	0.199338	-0.222299	0.379915	-0.317488
17	0.0091586	0.0531993	0.12164	0.0336104	0.107335		17	0.0778646	0.20027	0.219366	0.121184	-0.000917169		17	-0.0576246	0.0166782	-0.00773319	-0.0373264	0.177031
18	0.0495315	-0.0279315	0.216103	0.0219041	-0.0181644		18	-0.11407	-0.0651424	-0.110934	-0.316699	0.0192311		18	-0.137488	-0.0470927	-0.0620696	0.0297477	-0.128546
19	0.146029	0.0202325	0.108848	0.174589	0.0249433		19	-0.0853709	-0.327964	-0.0848279	-0.222078	0.190953		19	0.10416	-0.148269	-0.147551	-0.134595	0.0122396
20	0.228023	0.0796279	0.15208	-0.00278165	0.119439		20	-0.087122	0.135987	0.14495	0.0747894	0.0529352		20	0.164497	0.0303788	-0.206622	0.162911	-0.0364965
21	0.205702	0.0173522	0.125175	-0.15975	0.202567		21	-0.0759412	-0.118415	0.153246	-0.0820267	0.0863079		21	-0.27558	-0.225349	-0.0717481	-0.239754	0.210322
22	0.0833152	0.16279	0.28533	-0.104483	0.0741803		22	-0.104476	0.216445	0.0918552	0.00163655	0.0333349		22	-0.0273093	0.249279	-0.248513	0.21047	-0.0723731
23	0.145975	0.106157	-0.0757062	0.151094	0.0646667		23	-0.276525	-0.286204	-0.0632231	-0.157226	0.113532		23	0.128662	-0.189788	-0.00803086	-0.168979	-0.010784
24	0.0375128	-0.369638	-0.00218283	-0.289762	0.222904		24	0.157854	0.168635	0.102058	0.046752	-0.105053		24	0.143352	0.0875457	0.221029	0.0193619	-0.0623301
25	-0.0841575	0.0150769	0.0783021	-0.0172734	0.0950481		25	0.0172137	0.143622	0.0930316	0.0937474	-0.176811		25	0.142807	0.245768	-0.0413982	0.233457	-0.251468
26	0.0903079	-0.259339	0.0897873	-0.403996	0.176837		26	0.170512	-0.262053	-0.00972746	0.0130992	-0.057149		26	0.042689	0.0399464	-0.108977	0.0757282	-0.0710659
27	-0.234891	-0.439982	0.154897	0.123807	0.206664		27	0.165886	0.103754	0.0881841	0.16623	-0.0641672		27	-0.266	0.0428913	-0.0896814	-0.107676	0.200475
28	0.152882	-0.0798373	0.212554	0.0142692	-0.0133366		28	0.138877	0.0407792	-0.331473	0.273326	-0.04421		28	-0.248618	-0.344062	-0.110003	-0.329009	0.0889286
29	0.0632581	0.19129	-0.0878588	0.193623	-0.0842956		29	0.0685509	-0.218742	-0.00442004	-0.217579	0.125697		29	-0.218201	0.157935	0.0866441	0.00144304	-0.0743371
30	0.0817578	-0.215837	-0.0095417	-0.00193351	-0.0322232		30	-0.152395	-0.116643	-0.295682	-0.00212627	-0.0427598		30	-0.108004	-0.0616551	-0.235089	-0.0886479	-0.1218
31	0.310538	-0.359044	0.140344	-0.342463	0.117334		31	0.00667404	-0.0770003	-0.0257929	-0.0643438	-0.183133		31	0.363188	0.222442	-0.225442	0.112216	-0.195459
32	0.0787535	0.0478343	0.0700068	0.0328299	0.0953798		32	0.356897	0.395715	-0.221713	0.428655	-0.223814		32	0.0393654	0.126612	0.0340958	0.09789	-0.0996881
33	0.101708	0.0651443	-0.133427	0.0741292	-0.000450504		33	0.168743	-0.195871	0.0378361	0.0270805	-0.18007		33	-0.0969382	-0.16293	0.0521542	-0.214601	0.216647
34	-0.0600138	0.179835	-0.0524277	0.154424	-0.257255		34	0.235835	0.0182424	-0.181621	0.140396	0.0214836		34	0.0484709	-0.243561	-0.374652	-0.0997979	-0.0755564
35	0.127863	0.130512	-0.162149	0.0875206	-0.157947		35	-0.0434569	-0.0924486	-0.140627	-0.139619	0.256172		35	-0.041781	-0.00165292	-0.116929	0.0842181	0.0339547
36	-0.318226	-0.147003	0.320448	-0.274377	-0.0682418		36	-0.210471	-0.193279	-0.110043	0.102245	0.0365306		36	-0.254424	-0.341054	0.165085	-0.323492	0.0979516
37	0.315101	0.269655	-0.0232588	-0.129719	-0.1632		37	-0.0487015	-0.297903	-0.0786983	-0.252265	0.256648		37	0.0267555	0.105606	-0.062185	0.125561	-0.157061
38	0.055521	0.0136122	-0.0121356	-0.00858756	0.0321708		38	0.0332909	-0.0878357	-0.211338	0.113622	-0.163107		38	-0.22062	-0.120251	0.00209073	-0.0449245	0.0312986
39	-0.235318	-0.120671	0.0935489	-0.385929	0.161886		39	-0.0603817	-0.0932111	0.21415	-0.0471653	-0.286844		39	-0.0469827	-0.0888192	-0.168039	0.0707364	-0.134573
40	-0.0722896	-0.160586	0.226282	0.0223455	0.0990792		40	-0.0270135	-0.048913	-0.203759	0.259939	0.0587673		40	0.24874	0.304957	-0.0643687	0.231531	-0.338465
41	-0.0801231	-0.0311282	0.147771	-0.133188	0.0502763		41	-0.0342405	-0.142759	-0.0403074	-0.216875	0.171788		41	-0.0126086	-0.261718	-0.378059	0.0732675	-0.110662
42	0.0072713	0.0916535	-0.10255	-0.0883384	0.0608926		42	0.0624584	-0.153183	-0.12865	0.00183516	0.0946593		42	-0.0925068	-0.0639263	0.109666	-0.155903	0.172154
43	0.0470329	-0.0489317	0.0323118	0.23303	0.0862124		43	0.12406	-0.112973	-0.0739306	-0.0952441	0.242809		43	0.175037	0.0772525	-0.178145	0.227189	-0.171116
44	-0.241191	-0.0577352	0.0485669	-0.00393739	-0.0650197		44	-0.0420141	0.195985	0.127645	0.266701	-0.349858		44	-0.143497	0.0595265	0.106175	0.0472292	-0.0958395
45	-0.194402	0.0260039	-0.0286998	-0.036748	0.164864		45	0.0832973	-0.0165067	0.201092	-0.0427951	0.250346		45	-0.0226165	0.00944734	0.0928546	0.0489333	-0.0797498
46	0.0290239	-0.0555885	0.0671811	0.106812	0.173311		46	0.146047	0.367282	0.228903	0.198447	0.17633		46	-0.252953	-0.272733	-0.130637	-0.323862	0.00872024
47	0.142126	0.158414	0.0321966	0.144645	0.0936611		47	0.0473182	-0.145365	0.147132	-0.0900989	0.180841		47	-0.0174487	-0.119278	-0.165924	0.0833968	0.0245218
48	-0.083922	-0.135736	0.129603	-0.136294	0.0373782		48	0.11339	0.251489	-0.115701	0.362302	-0.263607		48	-0.0768813	-0.393937	-0.198222	-0.350082	0.0724593
49	-0.228013	-0.143849	-0.0161915	-0.0423925	0.0469761		49	0.110631	0.0551721	-0.149361	-0.0951107	0.182926		49	0.186846	0.23194	-0.0447964	0.433833	-0.0181152
50	0.103194	0.334006	0.0879003	0.152383	-0.0221058		50	-0.111767	0.0402091	-0.0282831	0.0629332	-0.0131366		50	-0.130224	-0.0521082	-0.098284	-0.0218731	0.114
51	-0.119633	-0.350066	-0.1479	0.213231	-0.054646		51	-0.246271	-0.306686	-0.0150237	-0.145044	0.0296929		51	0.113551	0.265133	0.00478661	0.0520235	0.0943104
52	-0.0510183	-0.160894	0.194254	-0.235851	0.187123		52	0.00401341	-0.0560529	0.116307	-0.0680206	0.190582		52	-0.221311	-0.391414	0.144365	-0.331415	0.0911926
53	0.0837323	-0.200026	-0.313466	-0.0286034	0.178019		53	-0.14367	0.0735867	0.138661	-0.0280413	0.059487		53	0.113816	-0.103882	-0.159796	0.0766463	0.110904
54	0.173244	0.192901	-0.142695	-0.0394289	-0.151522		54	0.249876	0.164876	-0.104755	0.147582	-0.160781		54	-0.2648	-0.182562	-0.163718	-0.275042	0.210861
55	-0.400204	-0.179155	-0.0199171	0.111971	-0.164726		55	0.0547037	0.075515	-0.0337469	0.193783	-0.0911395		55	-0.0939929	-0.0857608	-0.019885	-0.122761	0.0827547
56	-0.127288	-0.15287	0.245627	-0.350074	0.188931		56	-0.0967503	-0.14389	-0.309851	-0.163836	-0.135667		56	-0.223195	0.322161	-0.0294844	0.112983	0.00231744
57	0.0199199	-0.102614	0.00566927	-0.28867	0.165448		57	-0.0759605	-0.0523291	0.0243411	-0.101212	0.141469		57	0.00730149	-0.176602	-0.250835	0.0143607	0.10815
58	-0.0962597	0.192463	-0.0248475	0.122705	-0.170334		58	0.181805	-0.279772	-0.221031	-0.0968581	0.152034		58	0.243507	0.203781	-0.123178	0.286951	-0.165425
59	0.0637535	0.193099	0.131149	0.026169	-0.0698503		59	0.086741	-0.192531	-0.119126	-0.0336187	0.178759		59	-0.0484106	0.290161	-0.115061	0.266329	0.0116415
60	-0.164561	-0.277438	-0.0774048	-0.0994026	0.114339		60	0.0583607	-0.0539071	-0.0526176	0.0550258	0.0526308		60	-0.0738365	0.0057165	-0.149767	0.157433	-0.170959
61	-0.018772	0.00996347	-0.101819	-0.136018	-0.165583		61	0.0863623	0.284623	0.0825821	0.289748	-0.229183		61	0.0506562	-0.158823	-0.180769	0.0684417	-0.026503
62	0.140599	0.271679	-0.133078	0.300786	-0.254626		62	-0.0545593	-0.109681	-0.189661	0.106401	-0.0586358		62	0.105383	0.260107	-0.0669494	0.199488	-0.391908
63	0.138113	0.205742	0.0397518	0.201127	-0.0219819		63	0.0245134	-0.147009	-0.0586714	-0.0909609	0.201884		63	0.00254319	-0.0914051	-0.0229036	-0.0973545	0.1197
64	0.0484848	0.122491	-0.0333738	0.221809	-0.286538		64	-0.0217773	0.168227	0.0939617	0.0128017	-0.0459		64	-0.123526	-0.0897789	0.0125437	-0.186861	0.0914113
65	0.0814826	-0.00137233	0.0120086	-0.0283068	0.20632		65	-0.139743	-0.0425428	0.0221811	-0.130889	0.0521044		65	-0.0471044	0.0690831	-0.286445	0.109313	-0.118584
66	-0.162747	-0.155282	0.0762547	-0.0829586	-0.0383568		66	0.0394997	-0.018917	-0.110092	-0.0150026	0.0105469		66	-0.0162552	-0.233478	-0.223625	-0.40992	0.148443
67	-0.0725203	0.161237	0.0222353	-0.0637687	-0.18666		67	0.0542722	-0.123177	0.0274168	0.127584	-0.00455083		67	0.179228	-0.00573971	-0.163288	-0.151222	-0.00960561
68	-0.036985	0.113256	0.132542	-0.0266185	0.0141352		68	-0.0906218	-0.393623	-0.112219	-0.241775	0.305781		68	-0.145162	-0.0319034	0.0201171	-0.0655227	0.0112324
69	0.278661	-0.363712	-0.134496	-0.0515766	-0.110039		69	-0.228559	-0.301458	-0.10229	-0.324041	0.119406		69	0.171531	-0.176767	-0.00786305	0.237794	-0.294427
70	-0.0655981	-0.0736001	-0.0243744	-0.17753	-0.0124686		70	-0.150623	-0.178131	-0.0734031	-0.247784	0.0758311		70	-0.0481509	-0.249959	-0.128405	-0.167672	0.0269117
71	0.0441207	0.179673	0.0159137	0.140896	0.033304		71	-0.10536	-0.163819	-0.000433288	-0.0606684	0.0305207		71	0.195135	0.363421	-0.012059	0.332357	-0.194723
72	-0.080094	-0.111449	-0.0723899	-0.0282237	0.134904		72	0.0159444	0.162093	0.205883	-0.0175012	-0.0583114		72	0.0264389	-0.179842	-0.204381	-0.306721	0.0986028
73	0.0830417	-0.0894593	-0.0856264	0.00344665	0.0259023		73	0.0068157	-0.0974703	0.0323778	0.0464474	-0.110797		73	0.108491	0.197085	-0.237557	0.346266	-0.324206
74	-0.245452	-0.236473	-0.0998041	-0.0552416	0.0196544		74	-0.0427609	-0.0147691	0.113713	0.0170279	-0.17738		74	-0.052606	0.126476	-0.204293	-0.0205805	0.0700725
75	-0.218717	-0.185411	-0.275758	0.172283	-0.0920391		75	-0.0597309	-0.153919	-0.0129887	-0.0865593	0.124078		75	0.0942443	-0.0625858	-0.0546652	0.0598363	-0.126807
76	0.137679	0.291095	-0.0239201	-0.134944	0.200097		76	-0.0316161	-0.0450003	-0.134571	-0.0559964	-0.0248672		76	0.293434	0.13967	-0.238733	0.399446	-0.410156
77	-0.00400587	-0.108474	-0.110356	-0.254377	0.014853		77	0.0682261	0.0377587	-0.214952	0.0536323	-0.0358158		77	0.0644755	-0.00143612	-0.121447	0.0735378	0.111725
78	-0.0292143	-0.321519	-0.231093	-0.0876612	0.154571		78	-0.0235044	-0.0295956	0.0542263	-0.15505	0.0352046		78	-0.0283517	0.102803	-0.0571051	0.0427131	-0.177502
79	-0.00542908	-0.136922	-0.0994369	0.298292	0.0945816		79	0.276408	-0.0707883	-0.253002	-0.101491	0.136093		79	0.157312	0.197663	0.003183	0.266363	-0.224052
80	0.0144234	-0.125118	-0.0743392	0.0176783	0.107841		80	0.0159224	-0.0793305	0.144841	-0.00271087	-0.0787631		80	-0.0937041	-0.195249	-0.206063	-0.0584133	0.0635889
81	0.140961	0.158967	0.203075	-0.0702735	-0.016904		81	0.117053	-0.0813118	-0.214422	0.161139	-0.00366129		81	-0.0493197	0.229908	0.127808	0.0117027	0.0134449
82	-0.0603565	-0.209305	-0.053883	-0.0269698	0.0896436		82	0.0415834	-0.0502248	-0.217564	0.226417	-0.194729		82	-0.17065	-0.283895	-0.0573636	-0.319078	0.113848
83	0.168077	-0.0112317	-0.0523029	-0.0441065	0.123607		83	-0.166465	-0.151828	-0.0322272	0.203728	0.0678936		83	0.031135	-0.143476	-0.196423	0.0675422	0.0267913
84	-0.0505375	-0.0839043	-0.319218	0.00586913	-0.01037		84	-0.0879393	0.0150858	0.0356811	0.0689617	-0.0672927		84	-0.0625556	-0.187641	-0.016584	-0.0699209	-0.113319
85	0.103943	0.362733	-0.0225118	0.238206	-0.0396093		85	0.118774	0.215547	-0.118851	0.15431	-0.25519		85	-0.139039	-0.216496	-0.128035	-0.241806	-0.103154
86	0.0807287	-0.250773	-0.207278	-0.331026	0.118473		86	0.00966384	0.157629	-0.0679997	-0.0724776	-0.193014		86	0.111957	-0.238875	-0.32351	-0.179751	0.0467867
87	0.0706764	-0.212335	0.0900988	-0.232259	0.124515		87	-0.0536037	-0.222475	-0.013353	-0.170194	0.129346		87	0.247723	0.117388	0.138418	0.119028	-0.085272
88	-0.00477427	-0.27816	0.0467124	-0.310238	0.288694		88	0.00645302	-0.202069	-0.0360892	-0.186024	0.147097		88	-0.103441	-0.333658	-0.179877	-0.20151	0.119386
89	-0.0221457	0.136117	0.138295	-0.182895	-0.125193		89	0.13627	0.163275	-0.217744	0.342049	-0.367407		89	0.192909	-0.0350184	-0.090719	0.268242	-0.0474389
90	-0.153398	-0.0210967	0.147759	-0.162309	0.0209171		90	-0.0507791	-0.173689	-0.159819	0.0114717	0.153636		90	0.0673006	0.16655	0.0541704	0.140847	-0.133702
91	0.261523	0.252522	-0.0519723	0.232481	-0.247924		91	-0.0968217	-0.242871	0.145316	-0.199255	0.352291		91	-0.172645	-0.233158	-0.109329	-0.181955	0.23509
92	-0.0773756	-0.0913016	-0.0139422	0.193868	-0.0363762		92	0.229908	0.37736	0.154845	0.345033	-0.0585239		92	0.140976	0.197838	-0.212825	0.352801	-0.276961
93	-0.194065	-0.165833	0.165896	-0.0863555	-0.158803		93	0.0961861	0.196414	-0.184043	0.110766	-0.0646432		93	-0.132155	-0.216472	-0.0722469	-0.0739537	0.144183
94	0.0427866	0.0225005	-0.160562	0.140311	-0.0141834		94	0.115698	0.0657482	-0.114473	0.0633527	-0.0637068		94	-0.239664	-0.310098	-0.0689374	-0.13144	0.107058
95	0.106583	-0.0385034	0.0545933	0.0858807	0.105642		95	0.110732	0.128616	-0.125434	0.0885791	0.050752		95	-0.126575	-0.0443049	-0.229437	-0.100244	0.140922
96	-0.162509	-0.219274	-0.126034	0.212431	-0.145791		96	0.108714	0.0356911	-0.0773898	-0.0584377	0.0142062		96	0.0939449	0.080924	-0.0317104	0.057562	-0.0678612
97	-0.0463806	-0.00435387	-0.0428429	0.0653151	-0.104275		97	-0.0595331	-0.0199918	0.129112	0.0334881	0.0150975		97	-0.095602	-0.329187	0.196746	-0.442182	0.198976
98	0.0819484	0.158321	0.327076	0.0537611	0.0745412		98	-0.11026	-0.187588	0.156118	-0.14107	0.276966		98	-0.0514237	0.0997488	-0.170123	0.271539	-0.0864757
99	-0.130898	-0.418724	-0.192869	-0.170043	0.274096		99	-0.0603001	0.116845	0.089048	0.180591	-0.323547		99	0.137746	0.0341689	-0.232611	0.105145	-0.169781
100	0.0780468	-0.124535	-0.0803269	-0.0586539	-0.025802		100	-0.0405301	-0.124987	-0.241605	0.107906	0.137309		100	-0.117902	-0.0545453	-0.10214	-0.00370799	0.023867
Mean	0.00899596	-0.0324596	0.0102608	-0.0148456	0.0240982		Mean	0.0107482	-0.0425242	-0.0363051	0.00163245	0.0210434		Mean	-0.0030056	-0.0273653	-0.104501	0.0210049	-0.0378976
