# Supplementary material for: Modeling Dynamic Regulatory Processes in Stroke
Source: PLoS Comput Biol. 2012 Oct 11;8(10):e1002722. doi: 10.1371/journal.pcbi.1002722 (PMC3469412; doi:10.1371/journal.pcbi.1002722)
Supplement: Table S2 — External validation of network model using different interaction sets. (XLSX) [file pcbi.1002722.s006.xlsx]

## Sheet: Processed
From	To	OptScore	PPICount	PPIpvalue	MSIGDBCounts	MSIGDBpvalue	MouseNETCounts	MouseNETpvalue	CHEAdirCounts	CHEAdirpvalue	Self	PPI_Validated	MSIGDB_Validated	MouseNET_Validated	CHEAdir_Validated	Any_Validated	Sum_Validation	TruePositives
cluster_1	cluster_1	1	88	0	20	0.062	8	0.67	0	1	1	1	0	0	0	1	1	1
cluster_1	cluster_10	0	12	0.528	0	1	8	0.459	0	1		1	1	1	1	1	4	0
cluster_1	cluster_11	0	39	0.003	14	0.351	18	0.114	0	1		0	1	1	1	1	3	0
cluster_1	cluster_12	0	2	1	8	0.992	3	0.997	17	0.009		1	1	1	0	1	3	0
cluster_1	cluster_13	0.403858	21	0.138	7	0.601	20	0.008	1	0.997		0	0	1	0	1	1	1
cluster_1	cluster_14	0	4	0.601	0	1	3	0.545	0	1		1	1	1	1	1	4	0
cluster_1	cluster_15	-0.379533	12	0.168	9	0.002	4	0.848	46	0		0	1	0	1	1	2	0
cluster_1	cluster_16	1.14541	3	0.639	0	1	3	0.204	0	1		0	0	0	0	0	0	1
cluster_1	cluster_17	0	8	0.559	2	0.788	7	0.543	1	0.896		1	1	1	1	1	4	0
cluster_1	cluster_18	0	5	0.168	6	0.001	5	0.021	0	1		1	0	0	1	1	2	0
cluster_1	cluster_19	0	0	1	2	0.003	0	1	0	1		1	0	1	1	1	3	0
cluster_1	cluster_2	0	2	1	21	0.039	5	0.729	0	1		1	0	1	1	1	3	0
cluster_1	cluster_3	0	52	0.413	26	0.908	40	0.201	1	1		1	1	1	1	1	4	0
cluster_1	cluster_4	0	33	0.674	18	0.809	17	0.961	0	1		1	1	1	1	1	4	0
cluster_1	cluster_5	0	18	0.966	10	0.916	11	0.945	0	1		1	1	1	1	1	4	0
cluster_1	cluster_6	0	4	0.923	0	1	4	0.807	0	1		1	1	1	1	1	4	0
cluster_1	cluster_7	0.689666	2	0.751	1	0.442	1	0.651	0	1		0	0	0	0	0	0	1
cluster_1	cluster_8	0	1	0.785	0	1	1	0.529	0	1		1	1	1	1	1	4	0
cluster_1	cluster_9	0	1	0.964	2	0.744	2	0.571	0	1		1	1	1	1	1	4	0
cluster_10	cluster_1	0	12	0.528	0	1	8	0.459	0	1		1	1	1	1	1	4	0
cluster_10	cluster_10	1	64	0	6	0.042	16	0.001	0	1	1	1	1	1	0	1	3	1
cluster_10	cluster_11	0	18	0.189	3	0.84	12	0.199	0	1		1	1	1	1	1	4	0
cluster_10	cluster_12	0.139547	2	0.995	6	0.676	3	0.961	13	0		0	0	0	1	1	1	1
cluster_10	cluster_13	0	15	0.117	0	1	24	0	1	0.916		1	1	0	1	1	3	0
cluster_10	cluster_14	0	3	0.403	0	1	3	0.298	0	1		1	1	1	1	1	4	0
cluster_10	cluster_15	-0.159405	7	0.268	1	0.461	5	0.369	21	0		0	0	0	1	1	1	0
cluster_10	cluster_16	0	2	0.578	0	1	1	0.513	0	1		1	1	1	1	1	4	0
cluster_10	cluster_17	0	5	0.568	2	0.291	6	0.358	1	0.591		1	1	1	1	1	4	0
cluster_10	cluster_18	0	3	0.228	0	1	1	0.424	0	1		1	1	1	1	1	4	0
cluster_10	cluster_19	0	0	1	0	1	0	1	0	1		1	1	1	1	1	4	0
cluster_10	cluster_2	0	3	0.929	2	0.962	9	0.044	0	1		1	1	0	1	1	3	0
cluster_10	cluster_3	0.192991	61	0	14	0.583	38	0.004	1	0.998		1	0	1	0	1	2	1
cluster_10	cluster_4	0	21	0.714	5	0.954	18	0.472	0	1		1	1	1	1	1	4	0
cluster_10	cluster_5	0	22	0.166	4	0.858	17	0.089	0	1		1	1	1	1	1	4	0
cluster_10	cluster_6	0	8	0.113	0	1	10	0.014	0	1		1	1	0	1	1	3	0
cluster_10	cluster_7	0	3	0.25	0	1	2	0.212	0	1		1	1	1	1	1	4	0
cluster_10	cluster_8	0	2	0.336	0	1	0	1	0	1		1	1	1	1	1	4	0
cluster_10	cluster_9	0	2	0.615	0	1	4	0.073	0	1		1	1	1	1	1	4	0
cluster_11	cluster_1	0	39	0.003	14	0.351	18	0.114	0	1		0	1	1	1	1	3	0
cluster_11	cluster_10	0	18	0.189	3	0.84	12	0.199	0	1		1	1	1	1	1	4	0
cluster_11	cluster_11	1	114	0	38	0	28	0.031	0	1	1	1	1	1	0	1	3	1
cluster_11	cluster_12	0	11	0.873	23	0.112	5	0.993	18	0.005		1	1	1	0	1	3	0
cluster_11	cluster_13	0	24	0.151	15	0.02	33	0	3	0.94		1	0	0	1	1	2	0
cluster_11	cluster_14	0	4	0.755	2	0.324	6	0.194	0	1		1	1	1	1	1	4	0
cluster_11	cluster_15	0	19	0.012	14	0	12	0.122	44	0		0	0	1	0	1	1	0
cluster_11	cluster_16	0.837043	3	0.738	4	0.049	1	0.812	0	1		0	1	0	0	1	1	1
cluster_11	cluster_17	0	10	0.509	4	0.429	13	0.137	3	0.505		1	1	1	1	1	4	0
cluster_11	cluster_18	1.32568	5	0.245	10	0	3	0.224	0	1		0	1	0	0	1	1	1
cluster_11	cluster_19	0	1	0.428	0	1	1	0.292	0	1		1	1	1	1	1	4	0
cluster_11	cluster_2	-0.22827	9	0.841	14	0.529	10	0.278	0	1		0	0	0	0	0	0	0
cluster_11	cluster_3	0	56	0.683	39	0.22	36	0.845	0	1		1	1	1	1	1	4	0
cluster_11	cluster_4	0	27	0.994	38	0.002	32	0.418	0	1		1	0	1	1	1	3	0
cluster_11	cluster_5	0	20	0.985	16	0.46	16	0.862	0	1		1	1	1	1	1	4	0
cluster_11	cluster_6	0	13	0.114	2	0.945	10	0.185	0	1		1	1	1	1	1	4	0
cluster_11	cluster_7	0	0	1	5	0.004	1	0.758	0	1		1	0	1	1	1	3	0
cluster_11	cluster_8	0	2	0.637	1	0.471	0	1	0	1		1	1	1	1	1	4	0
cluster_11	cluster_9	0	4	0.68	2	0.754	6	0.081	0	1		1	1	1	1	1	4	0
cluster_12	cluster_1	0	2	1	8	0.992	3	0.997	0	1		1	1	1	1	1	4	0
cluster_12	cluster_10	1.12881	2	0.995	6	0.676	3	0.961	0	1		0	0	0	0	0	0	1
cluster_12	cluster_11	0	11	0.873	23	0.112	5	0.993	0	1		1	1	1	1	1	4	0
cluster_12	cluster_12	1	42	0	116	0	20	0.052	14	0.006	1	1	1	0	1	1	3	1
cluster_12	cluster_13	0	11	0.556	6	0.946	9	0.742	1	0.968		1	1	1	1	1	4	0
cluster_12	cluster_14	0	0	1	0	1	3	0.542	0	1		1	1	1	1	1	4	0
cluster_12	cluster_15	0	6	0.479	11	0.003	5	0.74	54	0		1	0	1	0	1	2	0
cluster_12	cluster_16	0	7	0.013	1	0.735	1	0.713	0	1		0	1	1	1	1	3	0
cluster_12	cluster_17	0	1	0.992	2	0.928	2	0.988	1	0.728		1	1	1	1	1	4	0
cluster_12	cluster_18	0	1	0.722	0	1	0	1	0	1		1	1	1	1	1	4	0
cluster_12	cluster_19	0	0	1	0	1	0	1	0	1		1	1	1	1	1	4	0
cluster_12	cluster_2	0	3	0.962	76	0	17	0.003	0	1		1	0	0	1	1	2	0
cluster_12	cluster_3	0	31	0.825	89	0	23	0.996	1	1		1	0	1	1	1	3	0
cluster_12	cluster_4	0	19	0.916	110	0	21	0.848	0	1		1	0	1	1	1	3	0
cluster_12	cluster_5	0	9	0.997	15	0.936	15	0.733	0	1		1	1	1	1	1	4	0
cluster_12	cluster_6	0	2	0.953	1	1	4	0.814	0	1		1	1	1	1	1	4	0
cluster_12	cluster_7	0	2	0.541	0	1	0	1	0	1		1	1	1	1	1	4	0
cluster_12	cluster_8	0	0	1	0	1	0	1	0	1		1	1	1	1	1	4	0
cluster_12	cluster_9	0	4	0.246	18	0	10	0.001	0	1		1	0	0	1	1	2	0
cluster_13	cluster_1	0.662771	21	0.138	7	0.601	20	0.008	0	1		0	0	1	0	1	1	1
cluster_13	cluster_10	0	15	0.117	0	1	24	0	0	1		1	1	0	1	1	3	0
cluster_13	cluster_11	-0.13598	24	0.151	15	0.02	33	0	0	1		0	1	1	0	1	2	0
cluster_13	cluster_12	0	11	0.556	6	0.946	9	0.742	22	0		1	1	1	0	1	3	0
cluster_13	cluster_13	1	78	0	8	0.148	44	0	1	0.977	1	1	0	1	0	1	2	1
cluster_13	cluster_14	0	8	0.053	1	0.374	11	0	0	1		1	1	0	1	1	3	0
cluster_13	cluster_15	0	11	0.129	2	0.392	11	0.05	36	0		1	1	1	0	1	3	0
cluster_13	cluster_16	0	8	0.021	0	1	2	0.446	0	1		0	1	1	1	1	3	0
cluster_13	cluster_17	0	10	0.205	2	0.519	20	0	1	0.773		1	1	0	1	1	3	0
cluster_13	cluster_18	1.87388	6	0.045	2	0.161	6	0.005	0	1		1	0	1	0	1	2	1
cluster_13	cluster_19	0	1	0.286	2	0.002	1	0.214	0	1		1	0	1	1	1	3	0
cluster_13	cluster_2	0	6	0.87	1	1	5	0.749	0	1		1	1	1	1	1	4	0
cluster_13	cluster_3	0	50	0.219	15	0.939	44	0.066	0	1		1	1	1	1	1	4	0
cluster_13	cluster_4	0	43	0.03	14	0.587	45	0	0	1		0	1	0	1	1	2	0
cluster_13	cluster_5	0	17	0.923	3	0.998	15	0.67	0	1		1	1	1	1	1	4	0
cluster_13	cluster_6	0	5	0.751	1	0.897	16	0	0	1		1	1	0	1	1	3	0
cluster_13	cluster_7	0	4	0.268	1	0.29	3	0.223	0	1		1	1	1	1	1	4	0
cluster_13	cluster_8	0	2	0.476	0	1	1	0.536	0	1		1	1	1	1	1	4	0
cluster_13	cluster_9	0	2	0.809	0	1	4	0.221	0	1		1	1	1	1	1	4	0
cluster_14	cluster_1	NA	4	0.601	0	1	3	0.545	0	1		0	0	0	0	0	0	1
cluster_14	cluster_10	NA	3	0.403	0	1	3	0.298	0	1		0	0	0	0	0	0	1
cluster_14	cluster_11	NA	4	0.755	2	0.324	6	0.194	0	1		0	0	0	0	0	0	1
cluster_14	cluster_12	NA	0	1	0	1	3	0.542	4	0.092		0	0	0	0	0	0	1
cluster_14	cluster_13	NA	8	0.053	1	0.374	11	0	0	1		0	0	1	0	1	1	1
cluster_14	cluster_14	1	24	0	0	1	2	0.143	0	1	1	1	0	0	0	1	1	1
cluster_14	cluster_15	NA	4	0.118	0	1	3	0.217	11	0		0	0	0	1	1	1	1
cluster_14	cluster_16	NA	0	1	0	1	0	1	0	1		0	0	0	0	0	0	1
cluster_14	cluster_17	NA	2	0.453	0	1	6	0.018	0	1		0	0	1	0	1	1	1
cluster_14	cluster_18	NA	1	0.276	1	0.034	2	0.042	0	1		0	1	1	0	1	2	1
cluster_14	cluster_19	NA	0	1	1	0	0	1	0	1		0	1	0	0	1	1	1
cluster_14	cluster_2	NA	2	0.557	0	1	1	0.713	0	1		0	0	0	0	0	0	1
cluster_14	cluster_3	NA	9	0.861	1	0.959	9	0.749	0	1		0	0	0	0	0	0	1
cluster_14	cluster_4	NA	5	0.922	1	0.853	8	0.506	0	1		0	0	0	0	0	0	1
cluster_14	cluster_5	NA	5	0.739	0	1	10	0.05	0	1		0	0	0	0	0	0	1
cluster_14	cluster_6	NA	1	0.657	0	1	2	0.404	0	1		0	0	0	0	0	0	1
cluster_14	cluster_7	NA	5	0	2	0.006	1	0.182	0	1		1	1	0	0	1	2	1
cluster_14	cluster_8	NA	1	0.166	0	1	1	0.12	0	1		0	0	0	0	0	0	1
cluster_14	cluster_9	NA	4	0.006	0	1	1	0.284	0	1		1	0	0	0	1	1	1
cluster_15	cluster_1	-0.291086	12	0.168	9	0.002	4	0.848	0	1		0	1	0	0	1	1	0
cluster_15	cluster_10	0	7	0.268	1	0.461	5	0.369	0	1		1	1	1	1	1	4	0
cluster_15	cluster_11	0	19	0.012	14	0	12	0.122	0	1		0	0	1	1	1	2	0
cluster_15	cluster_12	0	6	0.479	11	0.003	5	0.74	7	0.036		1	0	1	0	1	2	0
cluster_15	cluster_13	0	11	0.129	2	0.392	11	0.05	0	1		1	1	1	1	1	4	0
cluster_15	cluster_14	0	4	0.118	0	1	3	0.217	0	1		1	1	1	1	1	4	0
cluster_15	cluster_15	1	58	0	20	0	24	0	20	0	1	1	1	1	1	1	4	1
cluster_15	cluster_16	0	4	0.064	0	1	2	0.208	0	1		1	1	1	1	1	4	0
cluster_15	cluster_17	0	5	0.283	3	0.03	3	0.755	0	1		1	0	1	1	1	3	0
cluster_15	cluster_18	0	0	1	0	1	0	1	0	1		1	1	1	1	1	4	0
cluster_15	cluster_19	0	0	1	0	1	0	1	0	1		1	1	1	1	1	4	0
cluster_15	cluster_2	0	3	0.768	16	0	8	0.041	0	1		1	0	0	1	1	2	0
cluster_15	cluster_3	0	33	0.043	18	0.004	19	0.715	2	0.991		0	0	1	1	1	2	0
cluster_15	cluster_4	0	24	0.049	18	0	21	0.098	0	1		0	0	1	1	1	2	0
cluster_15	cluster_5	0	14	0.34	15	0	12	0.34	0	1		1	0	1	1	1	3	0
cluster_15	cluster_6	0	5	0.206	2	0.221	7	0.057	0	1		1	1	1	1	1	4	0
cluster_15	cluster_7	2.87929	2	0.328	0	1	0	1	0	1		0	0	0	0	0	0	1
cluster_15	cluster_8	0	0	1	0	1	0	1	0	1		1	1	1	1	1	4	0
cluster_15	cluster_9	0	2	0.417	1	0.285	5	0.012	0	1		1	1	0	1	1	3	0
cluster_16	cluster_1	-0.13102	3	0.639	0	1	3	0.204	0	1		0	0	0	0	0	0	0
cluster_16	cluster_10	0	2	0.578	0	1	1	0.513	0	1		1	1	1	1	1	4	0
cluster_16	cluster_11	0.239034	3	0.738	4	0.049	1	0.812	0	1		0	1	0	0	1	1	1
cluster_16	cluster_12	0	7	0.013	1	0.735	1	0.713	1	0.456		0	1	1	1	1	3	0
cluster_16	cluster_13	0	8	0.021	0	1	2	0.446	2	0.156		0	1	1	1	1	3	0
cluster_16	cluster_14	0	0	1	0	1	0	1	0	1		1	1	1	1	1	4	0
cluster_16	cluster_15	0	4	0.064	0	1	2	0.208	8	0		1	1	1	0	1	3	0
cluster_16	cluster_16	1	20	0	0	1	0	1	0	1	1	1	0	0	0	1	1	1
cluster_16	cluster_17	0	1	0.614	0	1	2	0.255	2	0.022		1	1	1	0	1	3	0
cluster_16	cluster_18	0	0	1	2	0.004	0	1	0	1		1	0	1	1	1	3	0
cluster_16	cluster_19	0	0	1	0	1	0	1	0	1		1	1	1	1	1	4	0
cluster_16	cluster_2	0	2	0.488	0	1	3	0.087	0	1		1	1	1	1	1	4	0
cluster_16	cluster_3	0	11	0.504	0	1	4	0.88	0	1		1	1	1	1	1	4	0
cluster_16	cluster_4	0	4	0.904	3	0.483	4	0.676	0	1		1	1	1	1	1	4	0
cluster_16	cluster_5	0	5	0.606	0	1	3	0.513	0	1		1	1	1	1	1	4	0
cluster_16	cluster_6	0	2	0.329	0	1	2	0.189	0	1		1	1	1	1	1	4	0
cluster_16	cluster_7	0	2	0.055	0	1	1	0.072	0	1		1	1	1	1	1	4	0
cluster_16	cluster_8	0	0	1	0	1	0	1	0	1		1	1	1	1	1	4	0
cluster_16	cluster_9	0	2	0.103	0	1	1	0.154	0	1		1	1	1	1	1	4	0
cluster_17	cluster_1	0	8	0.559	2	0.788	7	0.543	0	1		1	1	1	1	1	4	0
cluster_17	cluster_10	0	5	0.568	2	0.291	6	0.358	0	1		1	1	1	1	1	4	0
cluster_17	cluster_11	0	10	0.509	4	0.429	13	0.137	0	1		1	1	1	1	1	4	0
cluster_17	cluster_12	0	1	0.992	2	0.928	2	0.988	9	0.008		1	1	1	0	1	3	0
cluster_17	cluster_13	0	10	0.205	2	0.519	20	0	1	0.857		1	1	0	1	1	3	0
cluster_17	cluster_14	0	2	0.453	0	1	6	0.018	0	1		1	1	0	1	1	3	0
cluster_17	cluster_15	0	5	0.283	3	0.03	3	0.755	16	0		1	0	1	0	1	2	0
cluster_17	cluster_16	0	1	0.614	0	1	2	0.255	0	1		1	1	1	1	1	4	0
cluster_17	cluster_17	1	30	0	4	0.029	22	0	1	0.471	1	1	1	1	0	1	3	1
cluster_17	cluster_18	0	3	0.119	1	0.148	3	0.061	0	1		1	1	1	1	1	4	0
cluster_17	cluster_19	1.08207	0	1	0	1	0	1	0	1		0	0	0	0	0	0	1
cluster_17	cluster_2	0	3	0.79	1	0.955	3	0.765	0	1		1	1	1	1	1	4	0
cluster_17	cluster_3	0	26	0.335	11	0.445	24	0.523	0	1		1	1	1	1	1	4	0
cluster_17	cluster_4	0.103587	17	0.515	5	0.788	17	0.569	0	1		0	0	0	0	0	0	1
cluster_17	cluster_5	0	19	0.058	4	0.612	15	0.209	0	1		1	1	1	1	1	4	0
cluster_17	cluster_6	0	7	0.07	3	0.13	12	0	0	1		1	1	0	1	1	3	0
cluster_17	cluster_7	0	2	0.282	1	0.071	4	0.023	0	1		1	1	0	1	1	3	0
cluster_17	cluster_8	0	0	1	0	1	0	1	0	1		1	1	1	1	1	4	0
cluster_17	cluster_9	0	0	1	0	1	2	0.388	0	1		1	1	1	1	1	4	0
cluster_18	cluster_1	NA	5	0.168	6	0.001	5	0.021	0	1		0	1	1	0	1	2	1
cluster_18	cluster_10	NA	3	0.228	0	1	1	0.424	0	1		0	0	0	0	0	0	1
cluster_18	cluster_11	NA	5	0.245	10	0	3	0.224	0	1		0	1	0	0	1	1	1
cluster_18	cluster_12	NA	1	0.722	0	1	0	1	1	0.334		0	0	0	0	0	0	1
cluster_18	cluster_13	NA	6	0.045	2	0.161	6	0.005	0	1		1	0	1	0	1	2	1
cluster_18	cluster_14	NA	1	0.276	1	0.034	2	0.042	0	1		0	1	1	0	1	2	1
cluster_18	cluster_15	NA	0	1	0	1	0	1	3	0.001		0	0	0	1	1	1	1
cluster_18	cluster_16	NA	0	1	2	0.004	0	1	0	1		0	1	0	0	1	1	1
cluster_18	cluster_17	NA	3	0.119	1	0.148	3	0.061	0	1		0	0	0	0	0	0	1
cluster_18	cluster_18	1	6	0.002	6	0	0	1	0	1	1	1	1	0	0	1	2	1
cluster_18	cluster_19	NA	1	0.023	4	0	1	0.011	0	1		1	1	1	0	1	3	1
cluster_18	cluster_2	NA	0	1	0	1	0	1	0	1		0	0	0	0	0	0	1
cluster_18	cluster_3	NA	4	0.959	3	0.752	8	0.183	0	1		0	0	0	0	0	0	1
cluster_18	cluster_4	NA	4	0.803	2	0.694	3	0.686	0	1		0	0	0	0	0	0	1
cluster_18	cluster_5	NA	2	0.886	1	0.713	2	0.616	0	1		0	0	0	0	0	0	1
cluster_18	cluster_6	NA	1	0.505	0	1	2	0.122	0	1		0	0	0	0	0	0	1
cluster_18	cluster_7	NA	1	0.163	0	1	0	1	0	1		0	0	0	0	0	0	1
cluster_18	cluster_8	NA	0	1	1	0.026	0	1	0	1		0	1	0	0	1	1	1
cluster_18	cluster_9	NA	0	1	0	1	0	1	0	1		0	0	0	0	0	0	1
cluster_19	cluster_1	NA	0	1	2	0.003	0	1	0	1		0	1	0	0	1	1	1
cluster_19	cluster_10	NA	0	1	0	1	0	1	0	1		0	0	0	0	0	0	1
cluster_19	cluster_11	NA	1	0.428	0	1	1	0.292	0	1		0	0	0	0	0	0	1
cluster_19	cluster_12	NA	0	1	0	1	0	1	1	0.135		0	0	0	0	0	0	1
cluster_19	cluster_13	NA	1	0.286	2	0.002	1	0.214	0	1		0	1	0	0	1	1	1
cluster_19	cluster_14	NA	0	1	1	0	0	1	0	1		0	1	0	0	1	1	1
cluster_19	cluster_15	NA	0	1	0	1	0	1	0	1		0	0	0	0	0	0	1
cluster_19	cluster_16	NA	0	1	0	1	0	1	0	1		0	0	0	0	0	0	1
cluster_19	cluster_17	NA	0	1	0	1	0	1	0	1		0	0	0	0	0	0	1
cluster_19	cluster_18	NA	1	0.023	4	0	1	0.011	0	1		1	1	1	0	1	3	1
cluster_19	cluster_19	1	2	0	2	0	0	1	0	1	1	1	1	0	0	1	2	1
cluster_19	cluster_2	NA	0	1	0	1	0	1	0	1		0	0	0	0	0	0	1
cluster_19	cluster_3	NA	0	1	1	0.278	0	1	0	1		0	0	0	0	0	0	1
cluster_19	cluster_4	NA	4	0.088	2	0.025	3	0.137	0	1		0	1	0	0	1	1	1
cluster_19	cluster_5	NA	0	1	1	0.086	0	1	0	1		0	0	0	0	0	0	1
cluster_19	cluster_6	NA	1	0.097	0	1	1	0.11	0	1		0	0	0	0	0	0	1
cluster_19	cluster_7	NA	1	0.033	0	1	0	1	0	1		1	0	0	0	1	1	1
cluster_19	cluster_8	NA	1	0.013	1	0.003	0	1	0	1		1	1	0	0	1	2	1
cluster_19	cluster_9	NA	0	1	0	1	0	1	0	1		0	0	0	0	0	0	1
cluster_2	cluster_1	NA	2	1	21	0.039	5	0.729	0	1		0	1	0	0	1	1	1
cluster_2	cluster_10	NA	3	0.929	2	0.962	9	0.044	0	1		0	0	1	0	1	1	1
cluster_2	cluster_11	NA	9	0.841	14	0.529	10	0.278	0	1		0	0	0	0	0	0	1
cluster_2	cluster_12	NA	3	0.962	76	0	17	0.003	9	0.008		0	1	1	1	1	3	1
cluster_2	cluster_13	NA	6	0.87	1	1	5	0.749	0	1		0	0	0	0	0	0	1
cluster_2	cluster_14	NA	2	0.557	0	1	1	0.713	0	1		0	0	0	0	0	0	1
cluster_2	cluster_15	NA	3	0.768	16	0	8	0.041	33	0		0	1	1	1	1	3	1
cluster_2	cluster_16	NA	2	0.488	0	1	3	0.087	0	1		0	0	0	0	0	0	1
cluster_2	cluster_17	NA	3	0.79	1	0.955	3	0.765	0	1		0	0	0	0	0	0	1
cluster_2	cluster_18	NA	0	1	0	1	0	1	0	1		0	0	0	0	0	0	1
cluster_2	cluster_19	NA	0	1	0	1	0	1	0	1		0	0	0	0	0	0	1
cluster_2	cluster_2	1	44	0	66	0	20	0.001	0	1	1	1	1	1	0	1	3	1
cluster_2	cluster_3	NA	13	1	76	0	16	0.92	2	0.994		0	1	0	0	1	1	1
cluster_2	cluster_4	NA	6	0.999	61	0	9	0.969	0	1		0	1	0	0	1	1	1
cluster_2	cluster_5	NA	7	0.992	22	0.184	5	0.971	0	1		0	0	0	0	0	0	1
cluster_2	cluster_6	NA	1	0.968	2	0.966	2	0.805	0	1		0	0	0	0	0	0	1
cluster_2	cluster_7	NA	2	0.421	0	1	0	1	0	1		0	0	0	0	0	0	1
cluster_2	cluster_8	NA	0	1	0	1	0	1	0	1		0	0	0	0	0	0	1
cluster_2	cluster_9	NA	2	0.541	8	0.035	6	0.003	0	1		0	1	1	0	1	2	1
cluster_3	cluster_1	0	52	0.413	26	0.908	40	0.201	0	1		1	1	1	1	1	4	0
cluster_3	cluster_10	1.40183	61	0	14	0.583	38	0.004	0	1		1	0	1	0	1	2	1
cluster_3	cluster_11	0	56	0.683	39	0.22	36	0.845	0	1		1	1	1	1	1	4	0
cluster_3	cluster_12	-0.113349	31	0.825	89	0	23	0.996	32	0.016		0	1	0	1	1	2	0
cluster_3	cluster_13	0	50	0.219	15	0.939	44	0.066	1	1		1	1	1	1	1	4	0
cluster_3	cluster_14	0	9	0.861	1	0.959	9	0.749	0	1		1	1	1	1	1	4	0
cluster_3	cluster_15	0	33	0.043	18	0.004	19	0.715	113	0		0	0	1	0	1	1	0
cluster_3	cluster_16	0	11	0.504	0	1	4	0.88	0	1		1	1	1	1	1	4	0
cluster_3	cluster_17	0.489388	26	0.335	11	0.445	24	0.523	1	0.997		0	0	0	0	0	0	1
cluster_3	cluster_18	0	4	0.959	3	0.752	8	0.183	0	1		1	1	1	1	1	4	0
cluster_3	cluster_19	0	0	1	1	0.278	0	1	0	1		1	1	1	1	1	4	0
cluster_3	cluster_2	0	13	1	76	0	16	0.92	0	1		1	0	1	1	1	3	0
cluster_3	cluster_3	1	342	0	192	0	120	0.204	4	1	1	1	1	0	0	1	2	1
cluster_3	cluster_4	0.115112	107	0.134	102	0	81	0.468	0	1		0	1	0	0	1	1	1
cluster_3	cluster_5	0.187821	58	0.965	66	0.001	43	0.96	0	1		0	1	0	0	1	1	1
cluster_3	cluster_6	0	14	0.968	14	0.557	14	0.934	0	1		1	1	1	1	1	4	0
cluster_3	cluster_7	0	6	0.873	2	0.768	4	0.812	0	1		1	1	1	1	1	4	0
cluster_3	cluster_8	0.352048	9	0.252	2	0.758	6	0.337	0	1		0	0	0	0	0	0	1
cluster_3	cluster_9	-0.297057	7	0.945	9	0.594	8	0.628	0	1		0	0	0	0	0	0	0
cluster_4	cluster_1	0	33	0.674	18	0.809	17	0.961	0	1		1	1	1	1	1	4	0
cluster_4	cluster_10	0	21	0.714	5	0.954	18	0.472	0	1		1	1	1	1	1	4	0
cluster_4	cluster_11	0	27	0.994	38	0.002	32	0.418	0	1		1	0	1	1	1	3	0
cluster_4	cluster_12	0	19	0.916	110	0	21	0.848	33	0		1	0	1	0	1	2	0
cluster_4	cluster_13	0.332092	43	0.03	14	0.587	45	0	4	0.998		1	0	1	0	1	2	1
cluster_4	cluster_14	0	5	0.922	1	0.853	8	0.506	0	1		1	1	1	1	1	4	0
cluster_4	cluster_15	0	24	0.049	18	0	21	0.098	85	0		0	0	1	0	1	1	0
cluster_4	cluster_16	0	4	0.904	3	0.483	4	0.676	0	1		1	1	1	1	1	4	0
cluster_4	cluster_17	0.456958	17	0.515	5	0.788	17	0.569	4	0.788		0	0	0	0	0	0	1
cluster_4	cluster_18	0	4	0.803	2	0.694	3	0.686	0	1		1	1	1	1	1	4	0
cluster_4	cluster_19	0	4	0.088	2	0.025	3	0.137	0	1		1	0	1	1	1	3	0
cluster_4	cluster_2	0	6	0.999	61	0	9	0.969	0	1		1	0	1	1	1	3	0
cluster_4	cluster_3	0	107	0.134	102	0	81	0.468	3	1		1	0	1	1	1	3	0
cluster_4	cluster_4	1	174	0	116	0	52	0.717	0	1	1	1	1	0	0	1	2	1
cluster_4	cluster_5	0	40	0.961	31	0.31	31	0.93	0	1		1	1	1	1	1	4	0
cluster_4	cluster_6	0	12	0.818	8	0.715	13	0.663	0	1		1	1	1	1	1	4	0
cluster_4	cluster_7	0	4	0.86	2	0.525	4	0.608	0	1		1	1	1	1	1	4	0
cluster_4	cluster_8	0.711664	1	0.964	3	0.269	0	1	0	1		0	0	0	0	0	0	1
cluster_4	cluster_9	0	6	0.819	16	0.004	7	0.444	0	1		1	0	1	1	1	3	0
cluster_5	cluster_1	0	18	0.966	10	0.916	11	0.945	0	1		1	1	1	1	1	4	0
cluster_5	cluster_10	0	22	0.166	4	0.858	17	0.089	0	1		1	1	1	1	1	4	0
cluster_5	cluster_11	0	20	0.985	16	0.46	16	0.862	0	1		1	1	1	1	1	4	0
cluster_5	cluster_12	0	9	0.997	15	0.936	15	0.733	22	0.015		1	1	1	0	1	3	0
cluster_5	cluster_13	0.328027	17	0.923	3	0.998	15	0.67	1	1		0	0	0	0	0	0	1
cluster_5	cluster_14	0.324952	5	0.739	0	1	10	0.05	0	1		0	0	0	0	0	0	1
cluster_5	cluster_15	0	14	0.34	15	0	12	0.34	46	0		1	0	1	0	1	2	0
cluster_5	cluster_16	0	5	0.606	0	1	3	0.513	0	1		1	1	1	1	1	4	0
cluster_5	cluster_17	0	19	0.058	4	0.612	15	0.209	1	0.961		1	1	1	1	1	4	0
cluster_5	cluster_18	-0.138821	2	0.886	1	0.713	2	0.616	0	1		0	0	0	0	0	0	0
cluster_5	cluster_19	0.4124	0	1	1	0.086	0	1	0	1		0	0	0	0	0	0	1
cluster_5	cluster_2	0	7	0.992	22	0.184	5	0.971	0	1		1	1	1	1	1	4	0
cluster_5	cluster_3	0	58	0.965	66	0.001	43	0.96	1	1		1	0	1	1	1	3	0
cluster_5	cluster_4	0	40	0.961	31	0.31	31	0.93	0	1		1	1	1	1	1	4	0
cluster_5	cluster_5	1	112	0	30	0.06	28	0.415	0	1	1	1	0	0	0	1	1	1
cluster_5	cluster_6	0.298449	5	0.99	5	0.754	11	0.364	0	1		0	0	0	0	0	0	1
cluster_5	cluster_7	0	4	0.645	0	1	2	0.667	0	1		1	1	1	1	1	4	0
cluster_5	cluster_8	0.317028	2	0.778	0	1	0	1	0	1		0	0	0	0	0	0	1
cluster_5	cluster_9	-0.103838	3	0.906	0	1	1	0.946	0	1		0	0	0	0	0	0	0
cluster_6	cluster_1	0	4	0.923	0	1	4	0.807	0	1		1	1	1	1	1	4	0
cluster_6	cluster_10	0	8	0.113	0	1	10	0.014	0	1		1	1	0	1	1	3	0
cluster_6	cluster_11	0	13	0.114	2	0.945	10	0.185	0	1		1	1	1	1	1	4	0
cluster_6	cluster_12	0	2	0.953	1	1	4	0.814	6	0.291		1	1	1	1	1	4	0
cluster_6	cluster_13	0	5	0.751	1	0.897	16	0	2	0.801		1	1	0	1	1	3	0
cluster_6	cluster_14	0	1	0.657	0	1	2	0.404	0	1		1	1	1	1	1	4	0
cluster_6	cluster_15	0	5	0.206	2	0.221	7	0.057	23	0		1	1	1	0	1	3	0
cluster_6	cluster_16	0	2	0.329	0	1	2	0.189	0	1		1	1	1	1	1	4	0
cluster_6	cluster_17	0.684022	7	0.07	3	0.13	12	0	2	0.331		0	0	1	0	1	1	1
cluster_6	cluster_18	0	1	0.505	0	1	2	0.122	0	1		1	1	1	1	1	4	0
cluster_6	cluster_19	0	1	0.097	0	1	1	0.11	0	1		1	1	1	1	1	4	0
cluster_6	cluster_2	0	1	0.968	2	0.966	2	0.805	0	1		1	1	1	1	1	4	0
cluster_6	cluster_3	0	14	0.968	14	0.557	14	0.934	0	1		1	1	1	1	1	4	0
cluster_6	cluster_4	0	12	0.818	8	0.715	13	0.663	0	1		1	1	1	1	1	4	0
cluster_6	cluster_5	0.320126	5	0.99	5	0.754	11	0.364	0	1		0	0	0	0	0	0	1
cluster_6	cluster_6	1	22	0	4	0.133	6	0.129	0	1	1	1	0	0	0	1	1	1
cluster_6	cluster_7	0	2	0.253	1	0.151	0	1	0	1		1	1	1	1	1	4	0
cluster_6	cluster_8	0	0	1	0	1	0	1	0	1		1	1	1	1	1	4	0
cluster_6	cluster_9	0	1	0.66	0	1	0	1	0	1		1	1	1	1	1	4	0
cluster_7	cluster_1	0	2	0.751	1	0.442	1	0.651	0	1		1	1	1	1	1	4	0
cluster_7	cluster_10	0	3	0.25	0	1	2	0.212	0	1		1	1	1	1	1	4	0
cluster_7	cluster_11	0	0	1	5	0.004	1	0.758	0	1		1	0	1	1	1	3	0
cluster_7	cluster_12	0	2	0.541	0	1	0	1	2	0.073		1	1	1	1	1	4	0
cluster_7	cluster_13	0	4	0.268	1	0.29	3	0.223	0	1		1	1	1	1	1	4	0
cluster_7	cluster_14	0	5	0	2	0.006	1	0.182	0	1		0	0	1	1	1	2	0
cluster_7	cluster_15	0.203639	2	0.328	0	1	0	1	4	0		0	0	0	1	1	1	1
cluster_7	cluster_16	0	2	0.055	0	1	1	0.072	0	1		1	1	1	1	1	4	0
cluster_7	cluster_17	0	2	0.282	1	0.071	4	0.023	0	1		1	1	0	1	1	3	0
cluster_7	cluster_18	0	1	0.163	0	1	0	1	0	1		1	1	1	1	1	4	0
cluster_7	cluster_19	0	1	0.033	0	1	0	1	0	1		0	1	1	1	1	3	0
cluster_7	cluster_2	0	2	0.421	0	1	0	1	0	1		1	1	1	1	1	4	0
cluster_7	cluster_3	0	6	0.873	2	0.768	4	0.812	0	1		1	1	1	1	1	4	0
cluster_7	cluster_4	0	4	0.86	2	0.525	4	0.608	0	1		1	1	1	1	1	4	0
cluster_7	cluster_5	0	4	0.645	0	1	2	0.667	0	1		1	1	1	1	1	4	0
cluster_7	cluster_6	0	2	0.253	1	0.151	0	1	0	1		1	1	1	1	1	4	0
cluster_7	cluster_7	1	14	0	4	0	0	1	0	1	1	1	1	0	0	1	2	1
cluster_7	cluster_8	0	0	1	0	1	0	1	0	1		1	1	1	1	1	4	0
cluster_7	cluster_9	0	1	0.257	0	1	0	1	0	1		1	1	1	1	1	4	0
cluster_8	cluster_1	0	1	0.785	0	1	1	0.529	0	1		1	1	1	1	1	4	0
cluster_8	cluster_10	0	2	0.336	0	1	0	1	0	1		1	1	1	1	1	4	0
cluster_8	cluster_11	0	2	0.637	1	0.471	0	1	0	1		1	1	1	1	1	4	0
cluster_8	cluster_12	0	0	1	0	1	0	1	2	0.063		1	1	1	1	1	4	0
cluster_8	cluster_13	0	2	0.476	0	1	1	0.536	0	1		1	1	1	1	1	4	0
cluster_8	cluster_14	0	1	0.166	0	1	1	0.12	0	1		1	1	1	1	1	4	0
cluster_8	cluster_15	0	0	1	0	1	0	1	1	0.04		1	1	1	0	1	3	0
cluster_8	cluster_16	0	0	1	0	1	0	1	0	1		1	1	1	1	1	4	0
cluster_8	cluster_17	0	0	1	0	1	0	1	0	1		1	1	1	1	1	4	0
cluster_8	cluster_18	0	0	1	1	0.026	0	1	0	1		1	0	1	1	1	3	0
cluster_8	cluster_19	0	1	0.013	1	0.003	0	1	0	1		0	0	1	1	1	2	0
cluster_8	cluster_2	0	0	1	0	1	0	1	0	1		1	1	1	1	1	4	0
cluster_8	cluster_3	0	9	0.252	2	0.758	6	0.337	0	1		1	1	1	1	1	4	0
cluster_8	cluster_4	0	1	0.964	3	0.269	0	1	0	1		1	1	1	1	1	4	0
cluster_8	cluster_5	0	2	0.778	0	1	0	1	0	1		1	1	1	1	1	4	0
cluster_8	cluster_6	0	0	1	0	1	0	1	0	1		1	1	1	1	1	4	0
cluster_8	cluster_7	0	0	1	0	1	0	1	0	1		1	1	1	1	1	4	0
cluster_8	cluster_8	1	8	0	0	1	0	1	0	1	1	1	0	0	0	1	1	1
cluster_8	cluster_9	-0.114599	0	1	0	1	0	1	0	1		0	0	0	0	0	0	0
cluster_9	cluster_1	0	1	0.964	2	0.744	2	0.571	0	1		1	1	1	1	1	4	0
cluster_9	cluster_10	0	2	0.615	0	1	4	0.073	0	1		1	1	1	1	1	4	0
cluster_9	cluster_11	0	4	0.68	2	0.754	6	0.081	0	1		1	1	1	1	1	4	0
cluster_9	cluster_12	0	4	0.246	18	0	10	0.001	1	0.618		1	0	0	1	1	2	0
cluster_9	cluster_13	0	2	0.809	0	1	4	0.221	0	1		1	1	1	1	1	4	0
cluster_9	cluster_14	0	4	0.006	0	1	1	0.284	0	1		0	1	1	1	1	3	0
cluster_9	cluster_15	0	2	0.417	1	0.285	5	0.012	11	0		1	1	0	0	1	2	0
cluster_9	cluster_16	0	2	0.103	0	1	1	0.154	0	1		1	1	1	1	1	4	0
cluster_9	cluster_17	0	0	1	0	1	2	0.388	0	1		1	1	1	1	1	4	0
cluster_9	cluster_18	0	0	1	0	1	0	1	0	1		1	1	1	1	1	4	0
cluster_9	cluster_19	0	0	1	0	1	0	1	0	1		1	1	1	1	1	4	0
cluster_9	cluster_2	-0.117432	2	0.541	8	0.035	6	0.003	0	1		0	1	1	0	1	2	0
cluster_9	cluster_3	0	7	0.945	9	0.594	8	0.628	0	1		1	1	1	1	1	4	0
cluster_9	cluster_4	0	6	0.819	16	0.004	7	0.444	0	1		1	0	1	1	1	3	0
cluster_9	cluster_5	0	3	0.906	0	1	1	0.946	0	1		1	1	1	1	1	4	0
cluster_9	cluster_6	0	1	0.66	0	1	0	1	0	1		1	1	1	1	1	4	0
cluster_9	cluster_7	0	1	0.257	0	1	0	1	0	1		1	1	1	1	1	4	0
cluster_9	cluster_8	0	0	1	0	1	0	1	0	1		1	1	1	1	1	4	0
cluster_9	cluster_9	1	16	0	10	0	2	0.073	0	1	1	1	1	0	0	1	2	1
												0.66759	0.642659	0.642659	0.609418	0.819945		0.33518
